# Supplementary material for: Interactions between lean management and the psychosocial work environment in a hospital setting – a multi-method study
Source: PubMed Central journal article supplement (PMC4282497; doi:10.1186/1472-6963-14-480), 2014-10-22

Difference in scale scores between T1 and T2

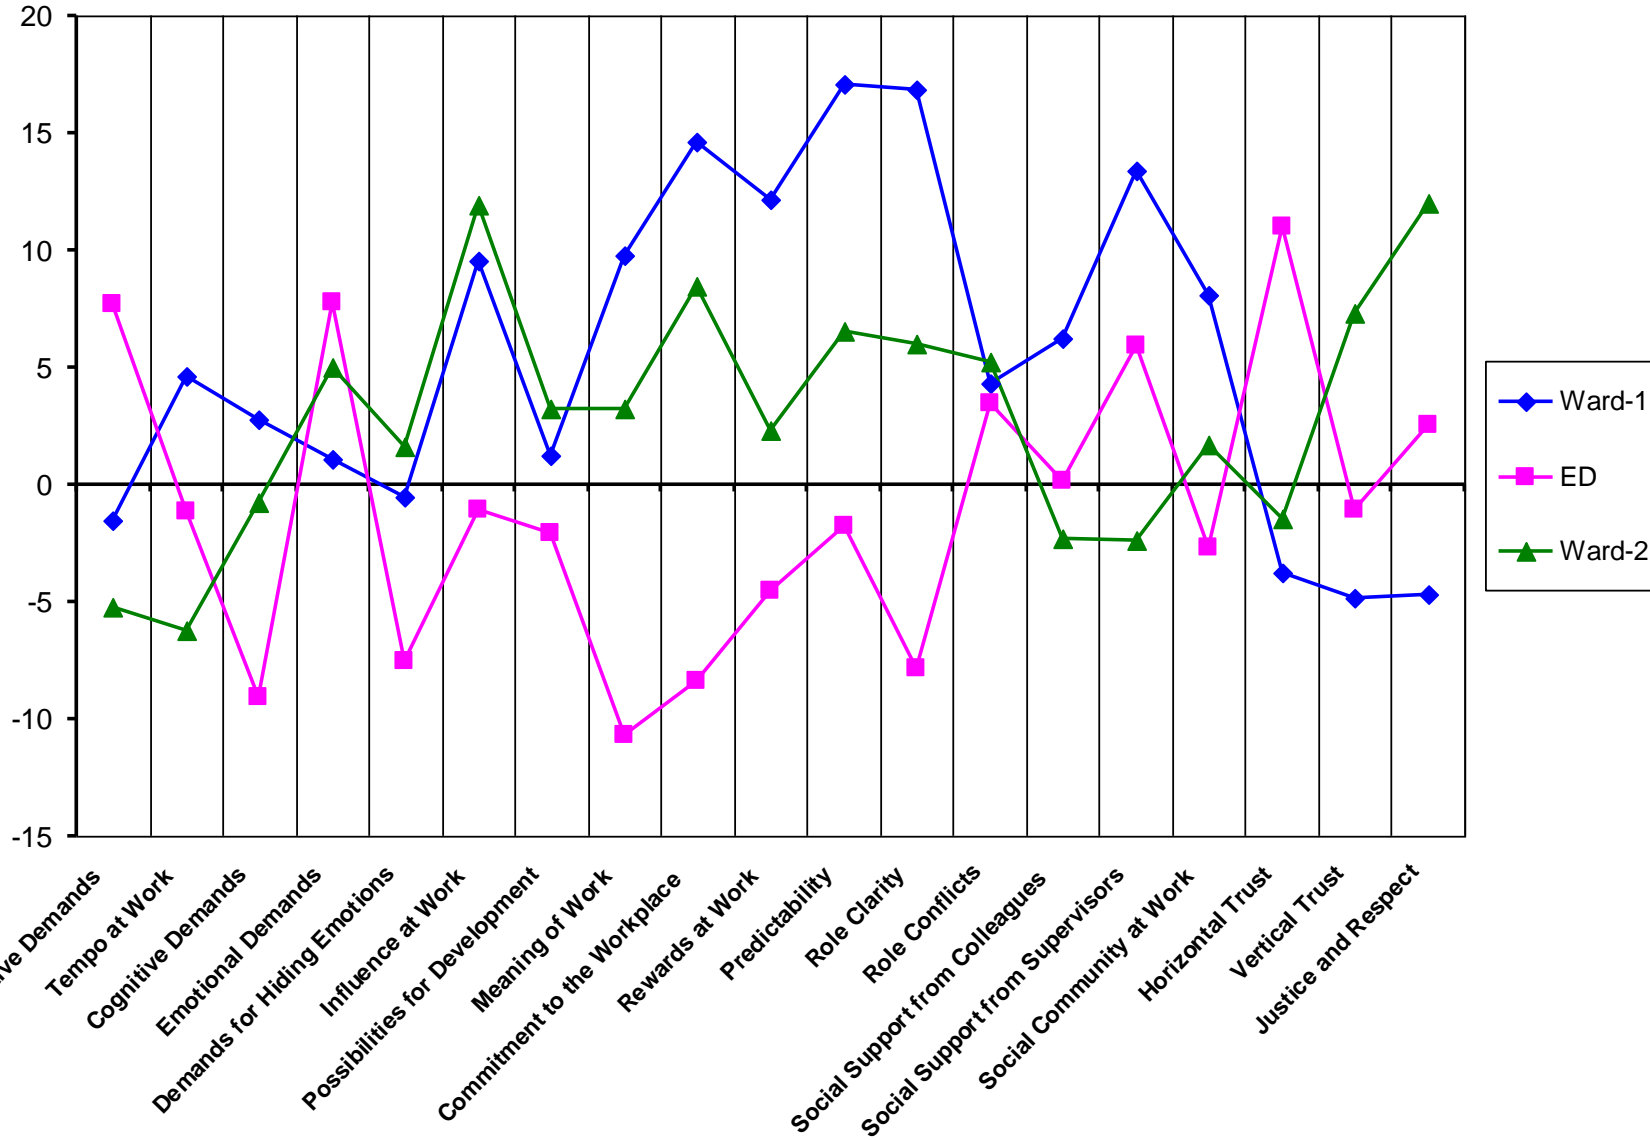

Supplement: 12913_2014_3580_MOESM1_ESM.pdf [file 12913_2014_3580_MOESM1_ESM.pdf]
